# Supplementary material for: Suppressing the Photocatalytic Activity of TiO2 Nanoparticles by Extremely Thin Al2O3 Films Grown by Gas-Phase Deposition at Ambient Conditions
Source: Nanomaterials (Basel). 2018 Jan 24;8(2):61. doi: 10.3390/nano8020061 (PMC5853694; doi:10.3390/nano8020061)
Supplement: Supplementary file 1 [file nanomaterials-08-00061-s001.pdf]

# Suppressing the Photocatalytic Activity of TiO<sub>2</sub> Nanoparticles by Extremely Thin Al<sub>2</sub>O<sub>3</sub> Films Grown by Gas-Phase Deposition at Ambient Conditions

Jing Guo<sup>1,2,4</sup>, Hao Van Bui<sup>1,5\*</sup>, David Valdesueiro<sup>1,3</sup>, Shaojun Yuan<sup>2</sup>, Bin Liang<sup>2</sup>, and J. Ruud van Ommen<sup>1</sup>

<sup>1</sup> Product & Process Engineering, Department of Chemical Engineering, Faculty of Applied Sciences, Delft University of Technology, 2629 HZ Delft, The Netherlands

<sup>2</sup> Multi-phase Mass Transfer & Reaction Engineering Lab, College of Chemical Engineering, Sichuan University, 610065, Chengdu, China

<sup>3</sup> Delft IMP B.V., Molengraaffsingel 10, 2629 JD Delft, The Netherlands

<sup>4</sup> Shanxi Province Key Laboratory of Hige-Oriented Chemical Engineering, North University of China, Taiyuan, Shanxi 030051, China

<sup>5</sup> Department of Physics, Quy Nhon University, 170 An Duong Vuong Street 590000, Quy Nhon City, Vietnam

\*Corresponding author: [V.H.Bui@tudelft.nl](mailto:V.H.Bui@tudelft.nl)

## Supporting Information

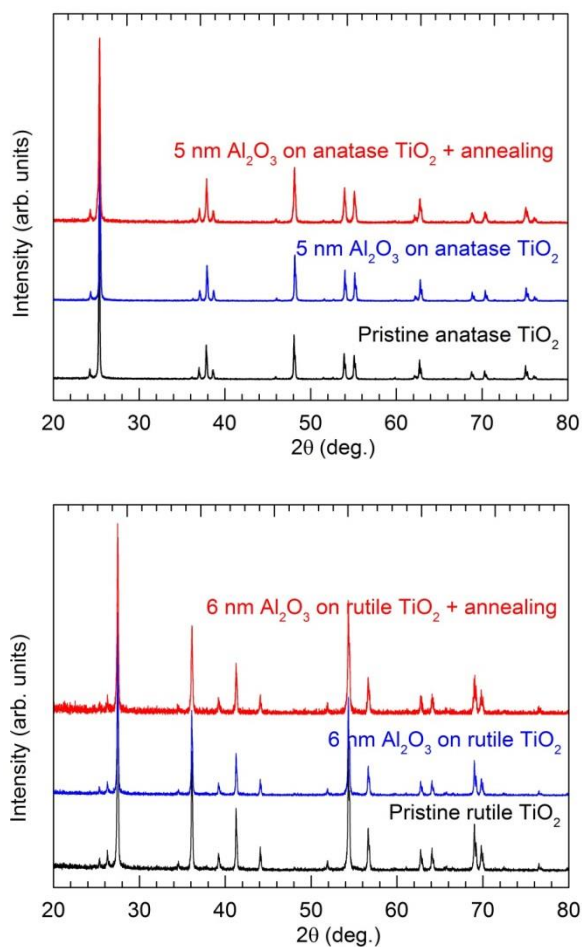

**Figure S1.** XRD patterns of uncoated TiO<sub>2</sub> and Al<sub>2</sub>O<sub>3</sub>-coated TiO<sub>2</sub>, with or without annealing at 500 °C for 12 hours: anatase (top) and rutile (bottom). No signature of Al<sub>2</sub>O<sub>3</sub> crystal phase was observed, suggesting the amorphous state of the coating layers. The coating has no effects on the crystalline structure of the TiO<sub>2</sub>, even after the annealing.

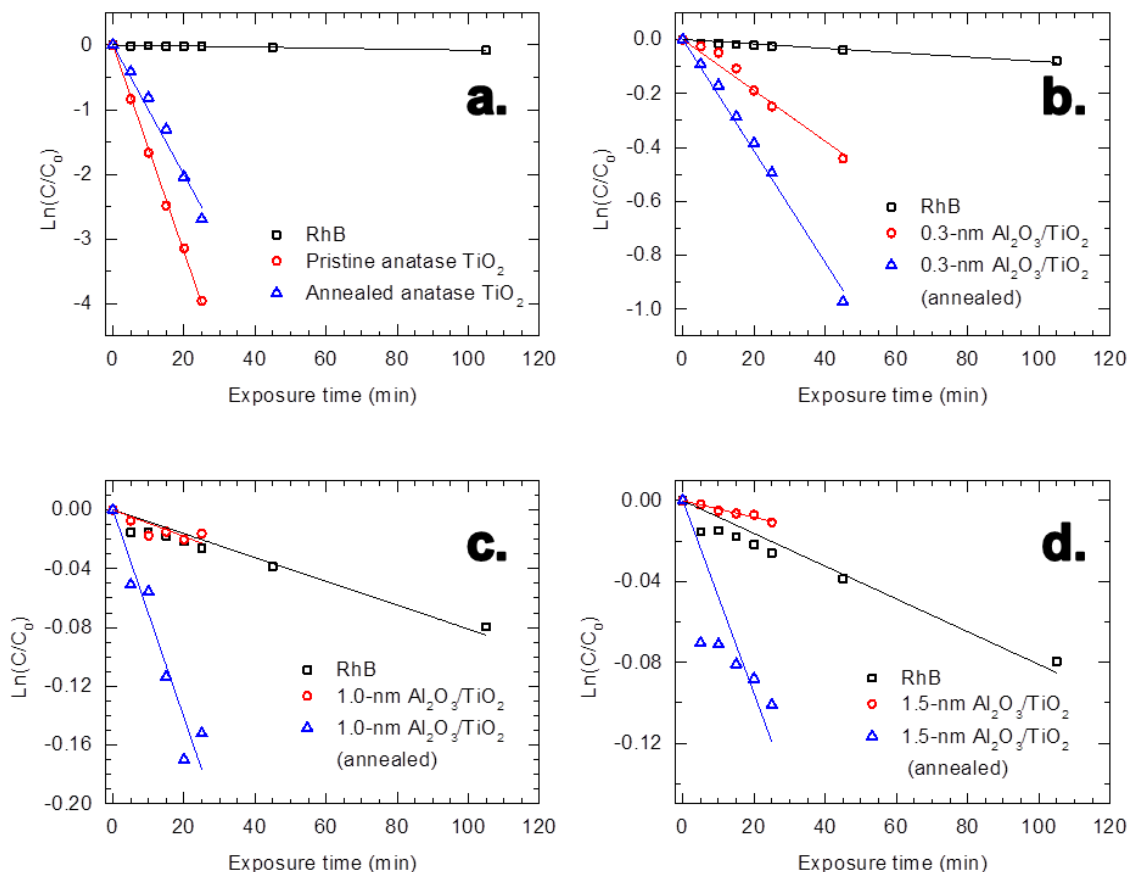

**Figure S2.** The comparison of photocatalytic activity of  $\text{Al}_2\text{O}_3/\text{TiO}_2$  (anatase) powders before and after annealing at 500 °C for 12 hours: (a) uncoated anatase  $\text{TiO}_2$ ; (b)  $\text{TiO}_2$  coated with 0.3 nm  $\text{Al}_2\text{O}_3$  (i.e., 1 ALD cycle, this value of thickness is estimated based on the growth-per-cycle (GPC) of 0.3 nm); (c)  $\text{TiO}_2$  coated with 1 nm  $\text{Al}_2\text{O}_3$ ; and (d)  $\text{TiO}_2$  coated with 1.5 nm  $\text{Al}_2\text{O}_3$ . From these plots, it is better seen that the degradation of the  $\text{TiO}_2$  coated with an  $\text{Al}_2\text{O}_3$  layer with a thickness of about 1 nm is identical with the self-degradation of RhB. The lower slope obtained for 1.5-nm  $\text{Al}_2\text{O}_3$  coated  $\text{TiO}_2$  compared to blank RhB (Figure d) is due to the contribution of incomplete removal of the particles by centrifugation. In this case, the residual particles virtually act as an “extra amount of RhB” that detected by the UV-Vis measurement. This effect is only visible when the degradation caused by the photocatalyst is negligible.

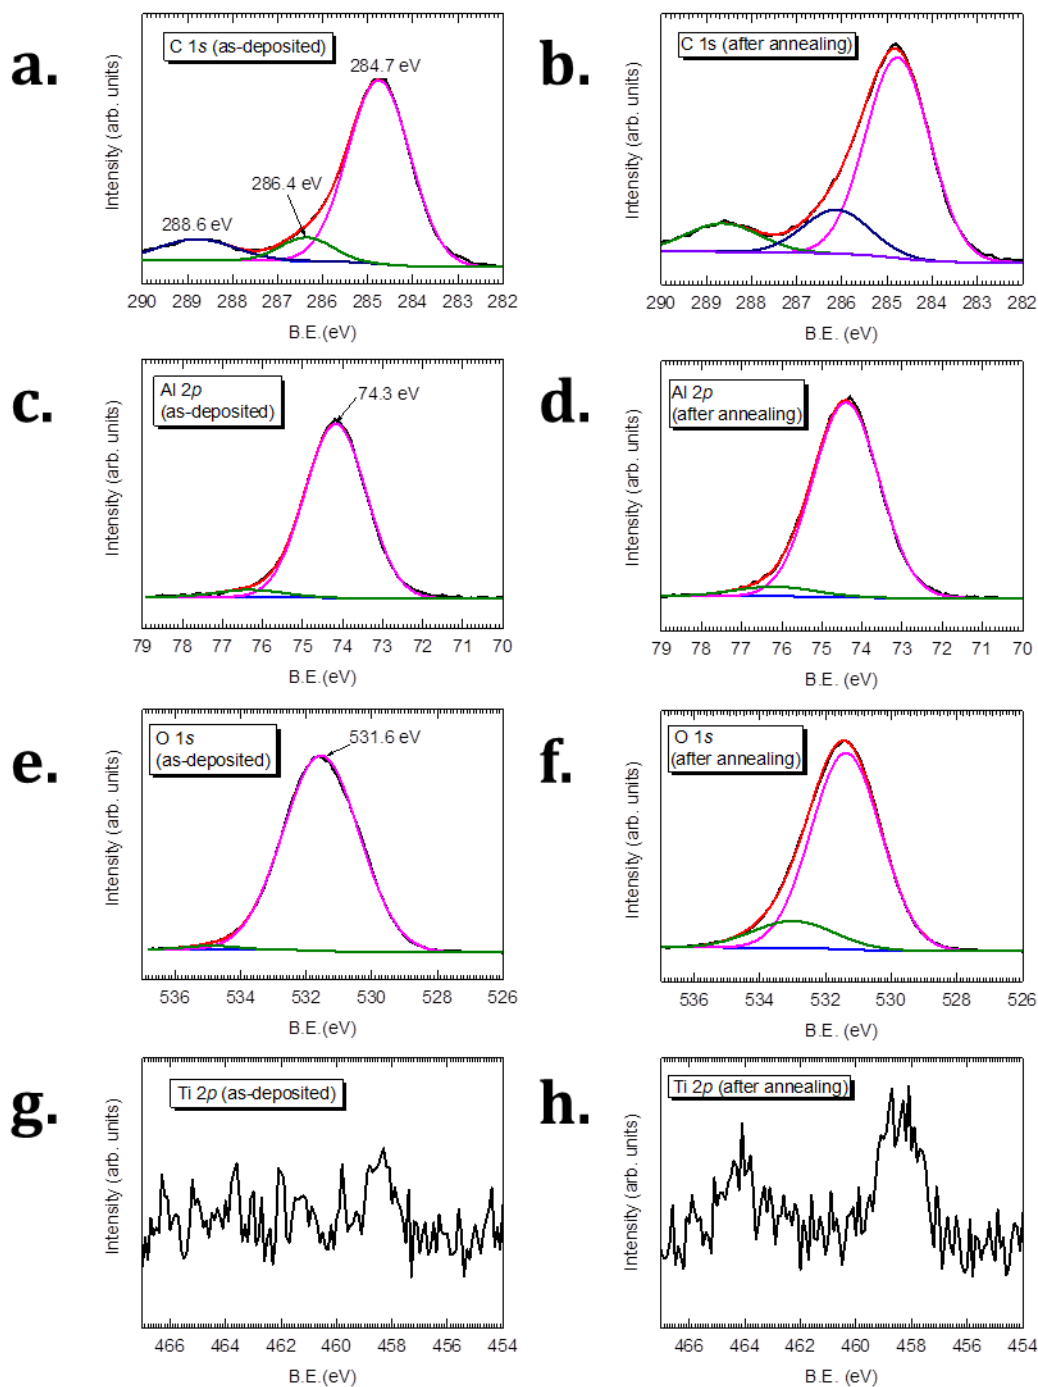

**Figure S3.** XPS spectra of C 1s, Al 2p, O 1s and Ti 2p core-levels of anatase TiO<sub>2</sub> coated with 5 nm Al<sub>2</sub>O<sub>3</sub>: as-deposited (a, c, e & g) and after annealing at 500 °C for 12 hours in air (b, d, f & h). No significant changes were observed for the spectra of C 1s and Al 2p after annealing.

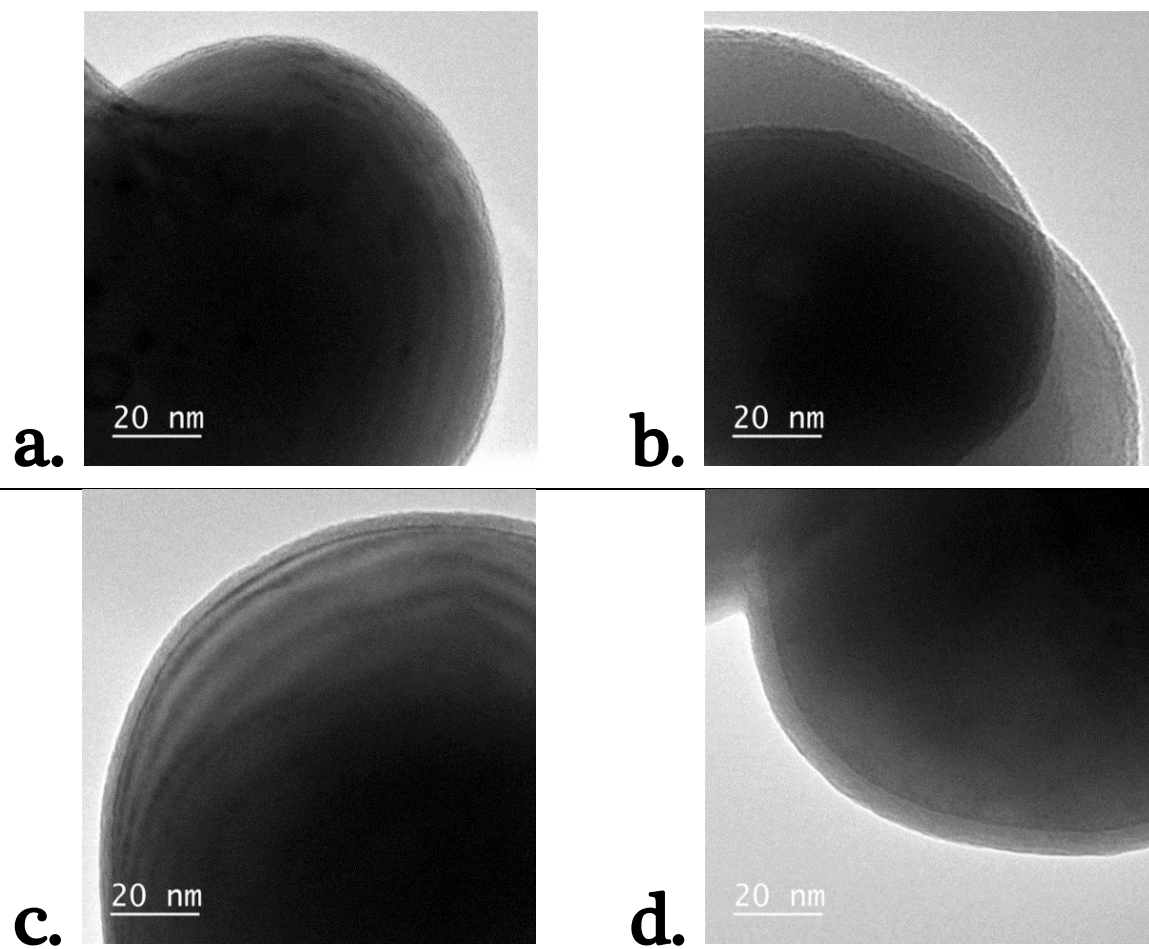

**Figure S4.** TEM micrographs of rutile TiO<sub>2</sub> coated with Al<sub>2</sub>O<sub>3</sub> films deposited for (a) 3 cycles, (b) 5 cycles, (c) 10 cycles and (d) 17 cycles. The results demonstrate the growth of uniform Al<sub>2</sub>O<sub>3</sub> films. A GPC of 0.34 nm was obtained for the deposition on rutile TiO<sub>2</sub> under the experimental conditions applied for the deposition on anatase TiO<sub>2</sub>.

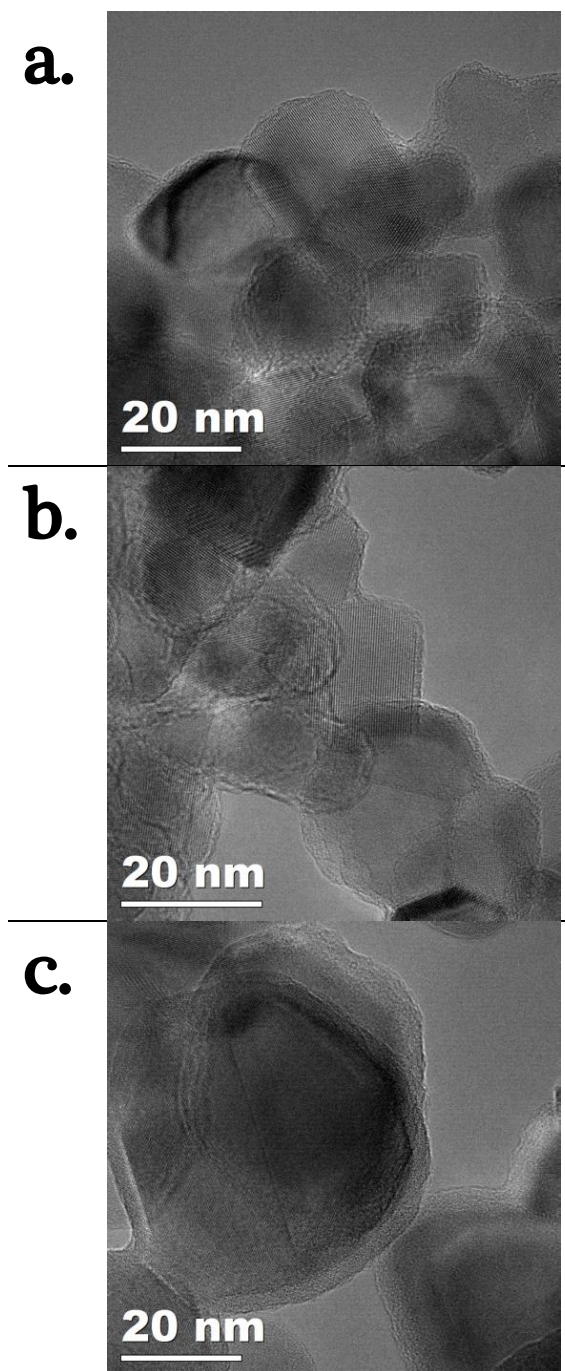

**Figure S5.** High-resolution TEM micrographs of P25 TiO<sub>2</sub> nanoparticles coated with Al<sub>2</sub>O<sub>3</sub> for (a) 4 cycles, (b) 7 cycles and (c) 15 cycles. The growth mechanism on P25 TiO<sub>2</sub> was reported elsewhere.<sup>1</sup> We observed that, in comparison with the growth on anatase and rutile TiO<sub>2</sub>, the uniformity of Al<sub>2</sub>O<sub>3</sub> films on P25 TiO<sub>2</sub> nanoparticles is lower. Nevertheless, an Al<sub>2</sub>O<sub>3</sub> layer with a thickness of approximately 1 nm obtained for 4 cycles could sufficiently suppress the high photocatalytic activity of the P25.

## References

- (1) Valdesueiro et al., Gas-Phase Deposition of Ultrathin Aluminium Oxide Films on Nanoparticles at Ambient Conditions. *Materials* **2015**, *8*, 1249-1263.
